# Supplementary material for: EPIphany—A Platform for Analysis and Visualization of Peptide Immunoarray Data
Source: PubMed Central journal article supplement (PMC9581008; doi:10.3389/fbinf.2021.694324), 2021-07-07
Supplement: Image1.pdf [file Image1.pdf]

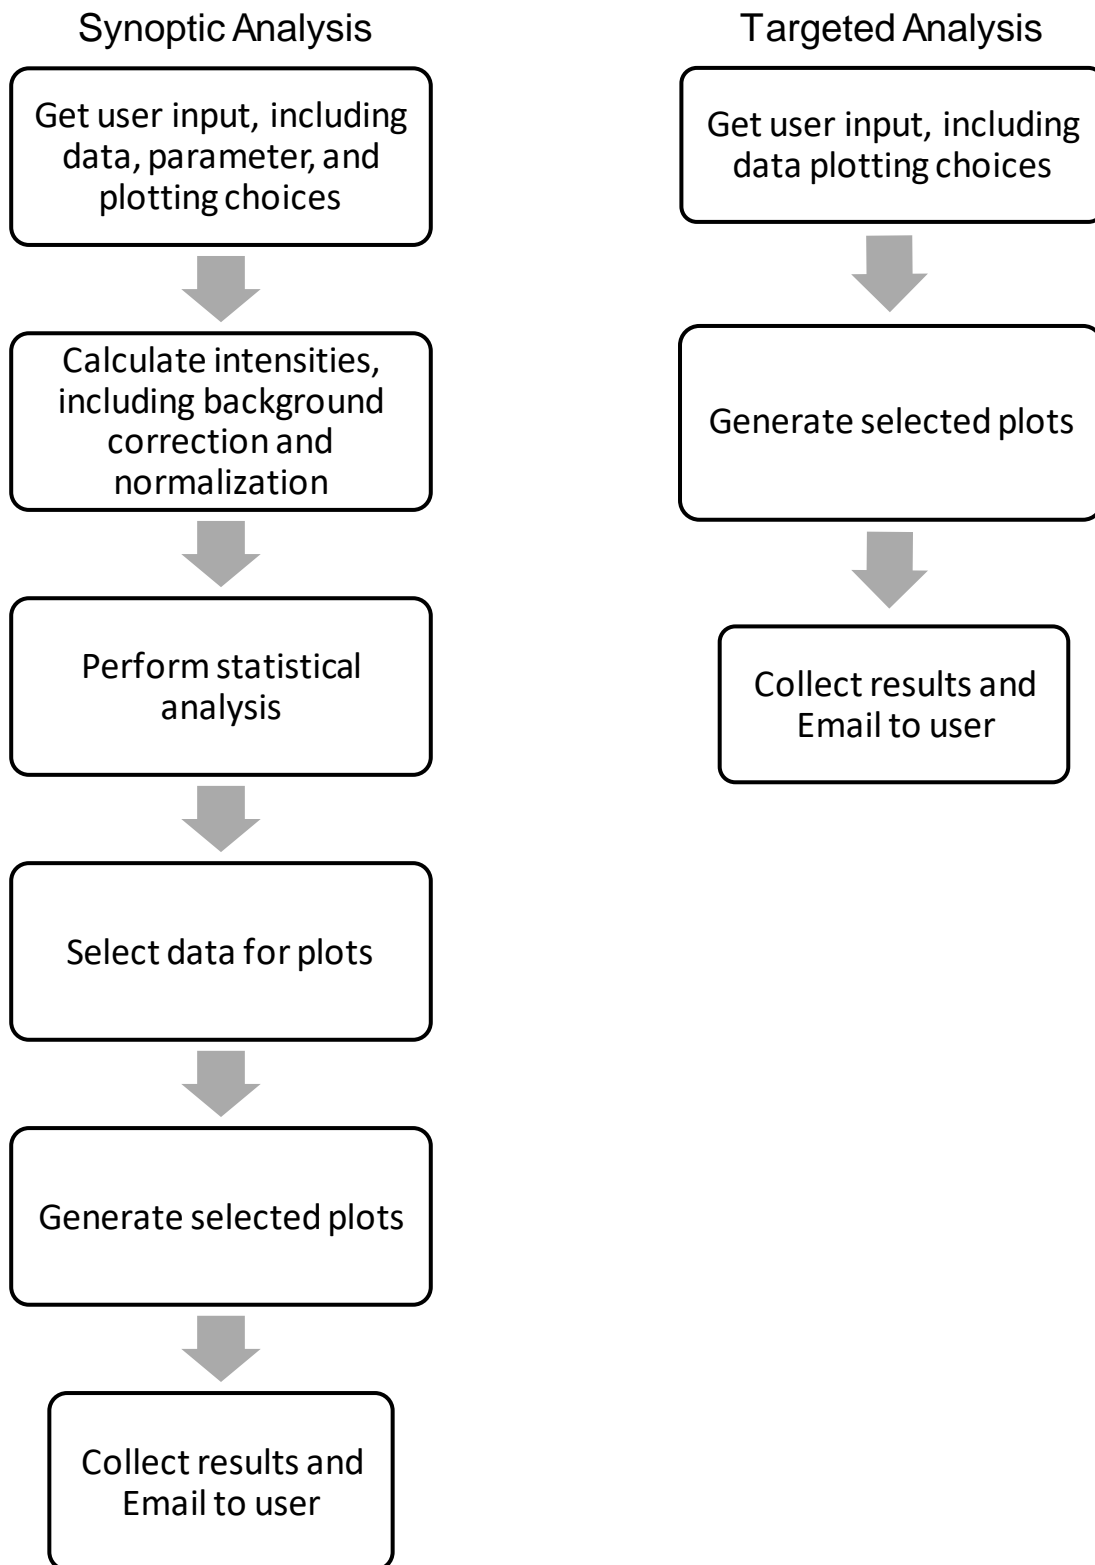

**Supplementary Figure 1.** Flow diagram depicting the workflow for synoptic and targeted analyses in EPIphany.
